# Supplementary material
Source: HighWire-hosted journal article supplement (http://www.cmaj.ca/highwire/filestream/57913/field_highwire_adjunct_files/0/aging-feldman-online_tt_A.pdf)
Supplement: aging-feldman-online_tt_A.pdf [file aging-feldman-online_tt_A.pdf]

**e-Table A: Crude odds ratios for incident cases of CIND, AD and VaD**

| Diagnosis      | Crude odds ratio (and 95% CI) |                   |                                   |                                       |
|----------------|-------------------------------|-------------------|-----------------------------------|---------------------------------------|
|                | Age (for every yr increase)   | Sex (F:M)         | Education (for every yr increase) | Presence v. absence of ApoE ε4 allele |
| CIND (n = 335) | 1.04 (1.02–1.06)*             | 1.00 (0.76–1.31)  | 0.92 (0.89–0.95)*                 | 1.20 (0.87–1.67)                      |
| AD (n = 138)   | 1.11 (1.08–1.14)*             | 2.06 (1.56–2.72)* | 0.90 (0.86–0.94)*                 | 2.35 (1.75–3.14)*                     |
| VaD (n = 51)   | 1.03 (0.99–1.08)              | 1.01 (0.59–1.73)  | 0.89 (0.83–0.96)*                 | 2.71 (1.53–4.72)*                     |

Note: CIND = "cognitive impairment no dementia," AD = Alzheimer's disease, VaD = vascular dementia, CI = confidence interval.

\*p < 0.05; crude odds ratios were analyzed independently of each other.

**e-Table B: Crude odds ratios for cases progressing from CIND**

| Progression            | Crude odds ratio (and 95% CI) |                   |                                   |                                       |
|------------------------|-------------------------------|-------------------|-----------------------------------|---------------------------------------|
|                        | Age (for every yr increase)   | Sex (F:M)         | Education (for every yr increase) | Presence v. absence of ApoE ε4 allele |
| CIND → normal (n = 29) | 1.00 (0.95–1.07)              | 1.09 (0.50–2.37)  | 1.01 (0.92–1.10)                  | 1.10 (0.45–2.68)                      |
| CIND → CIND (n = 85)   | 1.05 (1.01–1.09)*             | 1.22 (0.75–1.98)  | 0.84 (0.76–0.91)*                 | 1.21 (0.67–2.18)                      |
| CIND → AD (n = 68)     | 1.12 (1.08–1.17)*             | 1.94 (1.12–3.33)* | 0.85 (0.79–0.91)*                 | 1.86 (1.08–3.21)*                     |
| CIND → VaD (n = 9)     | 1.13 (1.02–1.26)*             | 2.71 (0.56–13.1)  | 0.61 (0.47–0.78)*                 | 1.16 (0.24–5.66)                      |

\*p < 0.05; crude odds ratios were analyzed independently of each other.
